# Supplementary material for: Assessment of immunogenicity from galcanezumab phase 3 trials in patients with episodic or chronic migraine
Source: PubMed Central journal article supplement — Cephalalgia. 2020 Apr 27;40(9):978–89. doi: 10.1177/0333102420920642 (PMC7469706; doi:10.1177/0333102420920642), 2020-04-27
Supplement: sj-pdf-1-cep-10.1177_0333102420920642.pdf [file sj-pdf-1-cep-10.1177_0333102420920642.pdf]

**Supplemental Table 1:** Overview of sampling procedures in the phase 3 trials

|                  | Sampling Month                       |     |   |   |   |   |     |   |     |   |   |   |   |    |    |    |
|------------------|--------------------------------------|-----|---|---|---|---|-----|---|-----|---|---|---|---|----|----|----|
| Study            | 0                                    | 0.5 | 1 | 2 | 3 | 4 | 4.5 | 5 | 5.5 | 6 | 7 | 8 | 9 | 10 | 11 | 12 |
| Phase 3          |                                      |     |   |   |   |   |     |   |     |   |   |   |   |    |    |    |
|                  | <b>Double-Blind Treatment Period</b> |     |   |   |   |   |     |   |     |   |   |   |   |    |    |    |
| REGAIN           |                                      |     |   |   |   |   |     |   |     |   |   |   |   |    |    |    |
| <b>Dosing</b>    | X                                    |     | X | X | X |   |     |   |     |   |   |   |   |    |    |    |
| <b>ADA</b>       | X                                    | X   | X | X | X |   |     |   |     |   |   |   |   |    |    |    |
| <b>GMB (PK)</b>  |                                      | X   | X | X | X |   |     |   |     |   |   |   |   |    |    |    |
| <b>CGRP (PD)</b> | X                                    | X   | X | X | X |   |     |   |     |   |   |   |   |    |    |    |
|                  | <b>Double-Blind Treatment Period</b> |     |   |   |   |   |     |   |     |   |   |   |   |    |    |    |
| EVOLVE-1 and -2  |                                      |     |   |   |   |   |     |   |     |   |   |   |   |    |    |    |
| <b>Dosing</b>    | X                                    |     | X | X | X | X |     | X |     |   |   |   |   |    |    |    |
| <b>ADA</b>       | X                                    | X   | X | X | X |   |     |   |     | X |   |   |   |    |    |    |
| <b>GMB (PK)</b>  |                                      | X   | X | X | X | X | X   | X | X   | X |   |   |   |    |    |    |
| <b>CGRP (PD)</b> | X                                    | X   | X | X | X | X | X   | X | X   | X |   |   |   |    |    |    |
|                  | <b>Open-Label Treatment Period</b>   |     |   |   |   |   |     |   |     |   |   |   |   |    |    |    |
| Study CGAJ       |                                      |     |   |   |   |   |     |   |     |   |   |   |   |    |    |    |
| <b>Dosing</b>    | X                                    |     | X | X | X | X |     | X |     | X | X | X | X | X  | X  |    |
| <b>ADA</b>       | X                                    | X   | X | X | X |   |     |   |     | X |   |   |   |    |    | X  |
| <b>GMB (PK)</b>  |                                      | X   | X | X | X |   |     |   |     | X |   |   |   |    |    | X  |
| <b>CGRP (PD)</b> | X                                    | X   | X | X | X |   |     |   |     | X |   |   |   |    |    | X  |

ADA = anti-drug antibodies; CGRP = calcitonin gene-related peptide; GMB = galcanezumab; PK = pharmacokinetic; PD = pharmacodynamic.
